# Supplementary material for: Sony Promotes the New Xperia With a Guerrilla Marketing Stunt
Source: Royal Society of Chemistry journal article supplement (doi:10.1039/b920199h), 2012-01-01
Supplement: b920199h.pdf [file b920199h.pdf]

## Electronic Supplementary Information

### **New discrete and polymeric supramolecular architectures derived from dinuclear Co(II), Ni(II) and Cu(II) complexes of aryl-linked bis- $\beta$ -diketonato ligands and nitrogen bases: synthetic, structural and high pressure studies†‡**

Jack K. Clegg,<sup>a</sup> Michael J. Hayter,<sup>a</sup> Katrina A. Jolliffe,<sup>a</sup> Leonard F. Lindoy,<sup>a\*</sup> John C. McMurtrie,<sup>b</sup> George V. Meehan,<sup>c</sup> Suzanne M. Neville,<sup>a</sup> Simon Parsons,<sup>d,e</sup> Peter A. Tasker,<sup>e</sup> Peter Turner<sup>a</sup> and Fraser J. White<sup>d,e</sup>

<sup>a</sup> School of Chemistry, University of Sydney, NSW, 2006, Australia

<sup>b</sup> School of Physical and Chemical Sciences, Queensland University of Technology, GPO Box 2434, Brisbane 4001, Australia

<sup>c</sup> School of Pharmacy and Molecular Sciences, James Cook University, Townsville, Qld 4814, Australia

<sup>d</sup> Centre for Science at Extreme Conditions, University of Edinburgh, King's Buildings, West Mains Road, Scotland.

<sup>e</sup> School of Chemistry, University of Edinburgh, King's Buildings, West Mains Road, EH9 3JJ, Scotland.

## Electronic Supplementary Information

### **Crystal Structure refinement details**

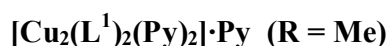

*Specific refinement details:*

The pyridine solvent molecule is disordered across and inversion site and was modelled in two positions with 50 % occupancy each.

*Selected Bond Lengths (Å) and Angles (°)*

|       |       |            |           |       |       |            |           |
|-------|-------|------------|-----------|-------|-------|------------|-----------|
| Cu(1) | O(1)  | 1.9282(12) |           | Cu(1) | O(2)  | 1.9304(12) |           |
| Cu(1) | O(3)  | 1.9326(12) |           | Cu(1) | O(4)  | 1.9496(13) |           |
| Cu(1) | N(1)  | 2.2546(15) |           |       |       |            |           |
| O(1)  | Cu(1) | O(2)       | 93.02(5)  |       |       |            |           |
| O(1)  | Cu(1) | O(3)       | 169.16(6) | O(2)  | Cu(1) | O(3)       | 85.29(5)  |
| O(1)  | Cu(1) | O(4)       | 87.12(5)  | O(2)  | Cu(1) | O(4)       | 167.54(6) |
| O(3)  | Cu(1) | O(4)       | 92.24(5)  | O(1)  | Cu(1) | N(1)       | 96.21(6)  |
| O(2)  | Cu(1) | N(1)       | 97.54(6)  | O(3)  | Cu(1) | N(1)       | 94.63(6)  |
| O(4)  | Cu(1) | N(1)       | 94.83(5)  |       |       |            |           |

**[Cu<sub>2</sub>(L<sup>1</sup>)<sub>2</sub>(EtPy)]·2EtPy (R = *t*-Bu)**

*Specific refinement details:*

The coordinated EtPy ligands and the *t*-Bu groups are each disordered over two positions and were modelled with a total occupancy of 1.

*Selected Bond Lengths (Å) and Angles (°)*

|      |       |       |            |      |       |       |            |
|------|-------|-------|------------|------|-------|-------|------------|
| N(1) |       | Cu(1) | 2.273(3)   | O(1) |       | Cu(1) | 1.937(2)   |
| O(2) |       | Cu(1) | 1.934(2)   | O(3) |       | Cu(1) | 1.936(2)   |
| O(4) |       | Cu(1) | 1.933(2)   |      |       |       |            |
| O(4) | Cu(1) | O(2)  | 170.64(11) | O(4) | Cu(1) | O(3)  | 92.70(9)   |
| O(2) | Cu(1) | O(3)  | 86.94(9)   | O(4) | Cu(1) | O(1)  | 86.30(9)   |
| O(2) | Cu(1) | O(1)  | 92.28(10)  | O(3) | Cu(1) | O(1)  | 169.06(11) |
| O(4) | Cu(1) | N(1)  | 93.17(11)  | O(2) | Cu(1) | N(1)  | 96.19(11)  |
| O(3) | Cu(1) | N(1)  | 92.65(11)  | O(1) | Cu(1) | N(1)  | 98.28(11)  |

**[Ni<sub>2</sub>(L<sup>1</sup>)<sub>2</sub>(pipi)<sub>4</sub>]·pipi (R = *t*-Bu)**

*Specific refinement details:*

The C(19) containing *t*-Bu group is disordered over three positions and the C(22) containing *t*-Bu group is disordered over two positions. Each were modelled with a total occupancy of 1. The free pipi is disordered over two positions (one 75 % the other 25 %). The hydrogen on the 25 % occupancy pipi nitrogen could not be located in the difference Fourier map and was not modelled.

*Selected Bond Lengths (Å) and Angles (°)*

|      |       |          |      |       |            |
|------|-------|----------|------|-------|------------|
| N(1) | Ni(1) | 2.123(3) | N(2) | Ni(1) | 2.173(3)   |
| N(3) | Ni(2) | 2.145(3) | O(8) | Ni(2) | 2.022(2)   |
| N(4) | Ni(2) | 2.156(3) | O(1) | Ni(1) | 2.005(2)   |
| O(2) | Ni(1) | 2.023(2) | O(3) | Ni(2) | 2.039(2)   |
| O(4) | Ni(2) | 2.002(2) | O(5) | Ni(1) | 2.022(2)   |
| O(6) | Ni(1) | 2.026(2) | O(7) | Ni(2) | 2.018(2)   |
| O(1) | Ni(1) |          | O(5) |       | 89.47(8)   |
| O(1) | Ni(1) |          | O(2) |       | 89.84(8)   |
| O(5) | Ni(1) |          | O(2) |       | 177.38(9)  |
| O(1) | Ni(1) |          | O(6) |       | 177.77(9)  |
| O(5) | Ni(1) |          | O(6) |       | 89.49(8)   |
| O(2) | Ni(1) |          | O(6) |       | 91.12(8)   |
| O(1) | Ni(1) |          | N(1) |       | 93.65(10)  |
| O(5) | Ni(1) |          | N(1) |       | 92.92(10)  |
| O(2) | Ni(1) |          | N(1) |       | 89.65(9)   |
| O(6) | Ni(1) |          | N(1) |       | 88.37(9)   |
| O(1) | Ni(1) |          | N(2) |       | 92.06(10)  |
| O(5) | Ni(1) |          | N(2) |       | 85.87(10)  |
| O(2) | Ni(1) |          | N(2) |       | 91.63(10)  |
| O(6) | Ni(1) |          | N(2) |       | 85.90(10)  |
| N(1) | Ni(1) |          | N(2) |       | 174.15(11) |
| O(4) | Ni(2) |          | O(7) |       | 179.09(9)  |
| O(4) | Ni(2) |          | O(8) |       | 89.51(9)   |
| O(7) | Ni(2) |          | O(8) |       | 89.68(8)   |
| O(4) | Ni(2) |          | O(3) |       | 89.13(8)   |
| O(7) | Ni(2) |          | O(3) |       | 91.70(8)   |
| O(8) | Ni(2) |          | O(3) |       | 176.62(9)  |
| O(4) | Ni(2) |          | N(3) |       | 91.16(9)   |
| O(7) | Ni(2) |          | N(3) |       | 88.47(9)   |
| O(8) | Ni(2) |          | N(3) |       | 93.95(10)  |
| O(3) | Ni(2) |          | N(3) |       | 89.17(10)  |
| O(4) | Ni(2) |          | N(4) |       | 87.97(10)  |
| O(7) | Ni(2) |          | N(4) |       | 92.48(10)  |
| O(8) | Ni(2) |          | N(4) |       | 91.70(10)  |
| O(3) | Ni(2) |          | N(4) |       | 85.16(11)  |
| N(3) | Ni(2) |          | N(4) |       | 174.27(11) |

*Hydrogen Bond Geometry*

| Donor | Hydrogen | Acceptor | D-H (Å)   | H-A (Å)   | D-A (Å)   | DHA (°) |
|-------|----------|----------|-----------|-----------|-----------|---------|
| N(1)  | H(1N)    | N(5)     | 0.891(10) | 2.188(13) | 3.070(6)  | 170(3)  |
| N(3)  | H(3N)    | N(5A)    | 0.886(10) | 2.19(2)   | 3.047(14) | 162(3)  |

### **[Cu<sub>2</sub>(L<sup>1</sup>)<sub>2</sub>(pipi)<sub>2</sub>]·pipi (R = *t*-Bu)**

#### *Specific refinement details:*

The molecule is centred around a mirror plane and inversion centre such that ¼ of the molecule is in the asymmetric unit. The central phenylene ring is disordered and modelled over three equal occupancy positions (including special positions). The uncoordinated pipi is also disordered and modelled over two positions. The N-bound H could not be located on this molecule and so was not modelled.

#### *Selected Bond Lengths (Å) and Angles (°)*

|      |       |          |      |       |            |
|------|-------|----------|------|-------|------------|
| N(1) | Cu(1) | 2.259(4) | O(2) | Cu(1) | 1.947(2)   |
| O(1) | Cu(1) | 1.947(2) |      |       |            |
| O(1) | Cu(1) |          | O(1) |       | 87.58(13)  |
| O(1) | Cu(1) |          | O(2) |       | 91.73(9)   |
| O(1) | Cu(1) |          | O(2) |       | 167.47(10) |
| O(1) | Cu(1) |          | O(2) |       | 167.47(10) |
| O(1) | Cu(1) |          | O(2) |       | 91.73(9)   |
| O(2) | Cu(1) |          | O(2) |       | 86.23(13)  |
| O(1) | Cu(1) |          | N(1) |       | 97.38(10)  |
| O(1) | Cu(1) |          | N(1) |       | 97.38(10)  |
| O(2) | Cu(1) |          | N(1) |       | 95.11(10)  |
| O(2) | Cu(1) |          | N(1) |       | 95.11(10)  |

#### *Hydrogen Bond Geometry*

| Donor | Hydrogen | Acceptor | D-H (Å) | H-A (Å) | D-A (Å) | DHA (°) |
|-------|----------|----------|---------|---------|---------|---------|
| N(1)  | H(1N)    | N(2A)    | 0.89(5) | 2.17(3) | 3.05(2) | 169(5)  |
| N(1)  | H(1N)    | N(2)     | 0.89(5) | 2.56(3) | 3.42(2) | 161(5)  |

### **[Co<sub>2</sub>(L<sup>1</sup>)<sub>2</sub>(tmen)<sub>2</sub>] (R = *t*-Bu)**

#### *Specific refinement details:*

The C(19) containing *t*-Bu group is disordered and modelled over two positions with total occupancy of 1.

#### *Selected Bond Lengths (Å) and Angles (°)*

|      |       |          |      |       |            |
|------|-------|----------|------|-------|------------|
| N(1) | Co(1) | 2.191(3) | N(2) | Co(1) | 2.207(3)   |
| O(1) | Co(1) | 2.054(2) | O(2) | Co(1) | 2.0432(19) |

|      |       |          |      |       |           |
|------|-------|----------|------|-------|-----------|
| O(3) | Co(1) | 2.054(2) | O(4) | Co(1) | 2.052(2)  |
| O(2) | Co(1) |          | O(4) |       | 175.52(8) |
| O(2) | Co(1) |          | O(1) |       | 87.54(8)  |
| O(4) | Co(1) |          | O(1) |       | 91.62(8)  |
| O(2) | Co(1) |          | O(3) |       | 89.57(8)  |
| O(4) | Co(1) |          | O(3) |       | 86.03(8)  |
| O(1) | Co(1) |          | O(3) |       | 89.79(8)  |
| O(2) | Co(1) |          | N(1) |       | 93.73(9)  |
| O(4) | Co(1) |          | N(1) |       | 90.68(8)  |
| O(1) | Co(1) |          | N(1) |       | 90.96(9)  |
| O(3) | Co(1) |          | N(1) |       | 176.65(9) |
| O(2) | Co(1) |          | N(2) |       | 87.68(9)  |
| O(4) | Co(1) |          | N(2) |       | 93.65(9)  |
| O(1) | Co(1) |          | N(2) |       | 171.80(9) |
| O(3) | Co(1) |          | N(2) |       | 96.83(9)  |
| N(1) | Co(1) |          | N(2) |       | 82.71(10) |

**[Ni<sub>2</sub>(L<sup>1</sup>)<sub>2</sub>(tmen)<sub>2</sub>] (R = *t*-Bu)**

*Specific refinement details:*

The C(19) containing *t*-Bu group is disordered and modelled over two positions with total occupancy of 1.

*Selected Bond Lengths (Å) and Angles (°)*

|      |       |          |      |       |            |
|------|-------|----------|------|-------|------------|
| N(1) | Ni(1) | 2.143(4) | N(2) | Ni(1) | 2.151(4)   |
| O(1) | Ni(1) | 2.022(3) | O(2) | Ni(1) | 2.034(3)   |
| O(3) | Ni(1) | 2.030(3) | O(4) | Ni(1) | 2.037(3)   |
| O(1) | Ni(1) |          | O(3) |       | 89.57(12)  |
| O(1) | Ni(1) |          | O(2) |       | 88.77(12)  |
| O(3) | Ni(1) |          | O(2) |       | 88.34(12)  |
| O(1) | Ni(1) |          | O(4) |       | 90.19(12)  |
| O(3) | Ni(1) |          | O(4) |       | 87.80(12)  |
| O(2) | Ni(1) |          | O(4) |       | 176.01(12) |
| O(1) | Ni(1) |          | N(1) |       | 90.84(14)  |
| O(3) | Ni(1) |          | N(1) |       | 178.79(14) |
| O(2) | Ni(1) |          | N(1) |       | 92.81(13)  |
| O(4) | Ni(1) |          | N(1) |       | 91.06(13)  |
| O(1) | Ni(1) |          | N(2) |       | 174.68(13) |
| O(3) | Ni(1) |          | N(2) |       | 94.74(13)  |
| O(2) | Ni(1) |          | N(2) |       | 88.25(13)  |
| O(4) | Ni(1) |          | N(2) |       | 93.09(13)  |
| N(1) | Ni(1) |          | N(2) |       | 84.92(15)  |

**[Cu<sub>2</sub>(L<sup>1</sup>)<sub>2</sub>(tmen)<sub>2</sub>] (R = *t*-Bu)**

*Specific refinement details:*

The tmen ligands are disordered over two equal occupancy positions. Each of which was modelled anisotropically with identical thermal ellipsoids.

*Selected Bond Lengths (Å) and Angles (°)*

|       |       |            |       |       |            |
|-------|-------|------------|-------|-------|------------|
| N(1)  | Cu(1) | 2.4237(15) | O(1)  | Cu(1) | 1.9279(13) |
| O(2)  | Cu(1) | 1.9338(12) | Cu(1) | O(3)  | 1.9294(13) |
| Cu(1) | O(4)  | 1.9302(13) |       |       |            |
| O(1)  | Cu(1) |            | O(3)  |       | 172.90(5)  |
| O(1)  | Cu(1) |            | O(4)  |       | 86.91(6)   |
| O(3)  | Cu(1) |            | O(4)  |       | 91.77(5)   |
| O(1)  | Cu(1) |            | O(2)  |       | 91.75(6)   |
| O(3)  | Cu(1) |            | O(2)  |       | 87.78(5)   |
| O(4)  | Cu(1) |            | O(2)  |       | 165.58(6)  |
| O(1)  | Cu(1) |            | N(1)  |       | 94.56(5)   |
| O(3)  | Cu(1) |            | N(1)  |       | 92.53(5)   |
| O(4)  | Cu(1) |            | N(1)  |       | 96.88(5)   |
| O(2)  | Cu(1) |            | N(1)  |       | 97.54(5)   |

**[Ni<sub>2</sub>(L<sup>1</sup>)<sub>2</sub>(Py)<sub>4</sub>]·dmpip (R = *t*-Bu)**

*Selected Bond Lengths (Å) and Angles (°)*

|      |       |            |      |       |            |
|------|-------|------------|------|-------|------------|
| N(1) | Ni(1) | 2.108(2)   | N(2) | Ni(1) | 2.123(2)   |
| O(2) | Ni(1) | 2.0205(17) | O(3) | Ni(1) | 2.0094(17) |
| O(4) | Ni(1) | 2.0097(16) | O(5) | Ni(1) | 2.0120(17) |
| O(3) | Ni(1) |            | O(4) |       | 176.48(6)  |
| O(3) | Ni(1) |            | O(5) |       | 90.14(7)   |
| O(4) | Ni(1) |            | O(5) |       | 92.14(7)   |
| O(3) | Ni(1) |            | O(2) |       | 87.08(7)   |
| O(4) | Ni(1) |            | O(2) |       | 90.63(7)   |
| O(5) | Ni(1) |            | O(2) |       | 177.22(6)  |
| O(3) | Ni(1) |            | N(1) |       | 94.23(8)   |
| O(4) | Ni(1) |            | N(1) |       | 88.52(8)   |
| O(5) | Ni(1) |            | N(1) |       | 88.29(7)   |
| O(2) | Ni(1) |            | N(1) |       | 91.96(7)   |
| O(3) | Ni(1) |            | N(2) |       | 90.32(8)   |
| O(4) | Ni(1) |            | N(2) |       | 87.10(8)   |
| O(5) | Ni(1) |            | N(2) |       | 87.80(7)   |
| O(2) | Ni(1) |            | N(2) |       | 92.16(7)   |
| N(1) | Ni(1) |            | N(2) |       | 174.01(7)  |

**{[Cu<sub>2</sub>(L<sup>1</sup>)<sub>2</sub>(pip)]·pip·2THF}<sub>n</sub> (R = *t*-Bu)**

*Specific refinement details:*

The N-bound hydrogens on the uncoordinated pip molecule could not be located in the difference Fourier map and were not modelled.

*Selected Bond Lengths (Å) and Angles (°)*

|      |       |          |            |       |          |      |           |
|------|-------|----------|------------|-------|----------|------|-----------|
| N(1) | Cu(1) | 2.265(3) | O(1)       | Cu(1) | 1.919(2) |      |           |
| O(2) | Cu(1) | 1.944(2) | O(3)       | Cu(1) | 1.930(2) |      |           |
| O(4) | Cu(1) | 1.936(2) |            |       |          |      |           |
| O(1) | Cu(1) | O(3)     | 172.35(10) | O(1)  | Cu(1)    | O(4) | 85.85(9)  |
| O(3) | Cu(1) | O(4)     | 91.65(9)   | O(1)  | Cu(1)    | O(2) | 91.73(9)  |
| O(3) | Cu(1) | O(2)     | 88.55(9)   | O(4)  | Cu(1)    | O(2) | 162.93(9) |
| O(1) | Cu(1) | N(1)     | 95.83(10)  | O(3)  | Cu(1)    | N(1) | 91.73(10) |
| O(4) | Cu(1) | N(1)     | 100.44(10) | O(2)  | Cu(1)    | N(1) | 96.62(10) |

*Hydrogen Bond Geometry*

| Donor | Hydrogen | Acceptor | D-H(Å)  | H-A(Å)  | D-A(Å)   | DHA (°) |
|-------|----------|----------|---------|---------|----------|---------|
| N(1)  | H(1N)    | O(1T)    | 0.89(4) | 2.32(3) | 3.195(4) | 167(3)  |

**[Cu<sub>2</sub>(L<sup>1</sup>)<sub>2</sub>(mmorph)<sub>2</sub>] (R = *t*-Bu)**

150(2) K

*Selected Bond Lengths (Å) and Angles (°)*

|      |       |            |           |       |            |      |           |
|------|-------|------------|-----------|-------|------------|------|-----------|
| O(1) | Cu(1) | 1.9288(17) | O(2)      | Cu(1) | 1.9266(17) |      |           |
| O(3) | Cu(1) | 1.9447(17) | O(4)      | Cu(1) | 1.9302(18) |      |           |
| N(1) | Cu(1) | 2.492(2)   |           |       |            |      |           |
| O(2) | Cu(1) | O(1)       | 92.73(7)  | O(2)  | Cu(1)      | O(4) | 174.01(7) |
| O(1) | Cu(1) | O(4)       | 86.24(7)  | O(2)  | Cu(1)      | O(3) | 88.14(7)  |
| O(1) | Cu(1) | O(3)       | 166.89(7) | O(4)  | Cu(1)      | O(3) | 91.53(7)  |
| N(1) | Cu(1) | O(5)       | 167.59(6) | O(2)  | Cu(1)      | N(1) | 89.91(7)  |
| O(1) | Cu(1) | N(1)       | 101.67(7) | O(4)  | Cu(1)      | N(1) | 96.08(8)  |
| O(3) | Cu(1) | N(1)       | 91.41(7)  |       |            |      |           |

293(2) K

*Specific refinement details:*

The C(1) containing *t*-Bu group is disordered and modelled over two positions with a total occupancy of 1. Completeness is also slightly lower than ideal, due to crystal decay during the collection from loss of coordinated mmorph ligands at this temperature.

*Selected Bond Lengths (Å) and Angles (°)*

|      |       |          |      |       |          |
|------|-------|----------|------|-------|----------|
| O(1) | Cu(1) | 1.915(3) | O(2) | Cu(1) | 1.911(3) |
|------|-------|----------|------|-------|----------|

|      |       |          |      |       |            |
|------|-------|----------|------|-------|------------|
| O(3) | Cu(1) | 1.925(3) | O(4) | Cu(1) | 1.922(3)   |
| N(1) | Cu(1) | 2.536(5) |      |       |            |
| O(2) | Cu(1) |          | O(1) |       | 92.53(13)  |
| O(2) | Cu(1) |          | O(4) |       | 174.06(16) |
| O(1) | Cu(1) |          | O(4) |       | 86.44(15)  |
| O(2) | Cu(1) |          | O(3) |       | 87.96(14)  |
| O(1) | Cu(1) |          | O(3) |       | 166.28(15) |
| O(4) | Cu(1) |          | O(3) |       | 91.65(14)  |
| O(2) | Cu(1) |          | N(1) |       | 90.82(16)  |
| O(1) | Cu(1) |          | N(1) |       | 102.42(16) |
| O(4) | Cu(1) |          | N(1) |       | 95.12(17)  |
| O(3) | Cu(1) |          | N(1) |       | 91.28(16)  |

*1.9 kbar*

*Selected Bond Lengths (Å) and Angles (°)*

|       |       |           |       |      |           |
|-------|-------|-----------|-------|------|-----------|
| Cu(1) | O(4)  | 1.929(10) | Cu(1) | O(3) | 1.895(11) |
| Cu(1) | N(1)  | 2.484(10) | Cu(1) | O(1) | 1.905(13) |
| Cu(1) | O(2)  | 1.914(8)  |       |      |           |
| O(4)  | Cu(1) |           | O(3)  |      | 90.9(4)   |
| O(4)  | Cu(1) |           | N(1)  |      | 96.4(4)   |
| O(3)  | Cu(1) |           | N(1)  |      | 91.5(4)   |
| O(4)  | Cu(1) |           | O(1)  |      | 86.7(5)   |
| O(3)  | Cu(1) |           | O(1)  |      | 166.0(3)  |
| N(1)  | Cu(1) |           | O(1)  |      | 102.5(4)  |
| O(4)  | Cu(1) |           | O(2)  |      | 173.9(3)  |
| O(3)  | Cu(1) |           | O(2)  |      | 88.8(4)   |
| N(1)  | Cu(1) |           | O(2)  |      | 89.7(3)   |
| O(1)  | Cu(1) |           | O(2)  |      | 92.1(4)   |

*9.1 kbar*

*Selected Bond Lengths (Å) and Angles (°)*

|      |       |          |      |       |          |
|------|-------|----------|------|-------|----------|
| N(1) | Cu(1) | 2.445(7) | O(1) | Cu(1) | 1.915(8) |
| O(2) | Cu(1) | 1.924(6) | O(3) | Cu(1) | 1.917(7) |
| O(4) | Cu(1) | 1.942(6) |      |       |          |
| N(1) | Cu(1) |          | O(4) |       | 97.2(2)  |
| N(1) | Cu(1) |          | O(2) |       | 89.2(2)  |
| O(4) | Cu(1) |          | O(2) |       | 173.6(2) |
| N(1) | Cu(1) |          | O(3) |       | 91.3(3)  |
| O(4) | Cu(1) |          | O(3) |       | 91.5(3)  |
| O(2) | Cu(1) |          | O(3) |       | 88.3(3)  |
| N(1) | Cu(1) |          | O(1) |       | 100.9(3) |
| O(4) | Cu(1) |          | O(1) |       | 85.8(3)  |



|      |       |      |          |
|------|-------|------|----------|
| O(2) | Cu(1) | O(1) | 93.0(3)  |
| O(3) | Cu(1) | O(1) | 167.7(2) |
